# Supplementary material for: Cholesterol- and ssDNA-binding fusion protein-mediated DNA tethering on the plasma membrane
Source: Royal Society of Chemistry journal article supplement (doi:10.1039/d4bm01127a), 2024-11-06
Supplement: d4bm01127a1.pdf [file d4bm01127a1.pdf]

## Supporting Information

# Cholesterol- and ssDNA-binding fusion protein-mediated DNA tethering on plasma membrane

Kei Nishida<sup>†</sup>, Minon Ishizuka, Eiry Kobatake<sup>†</sup>, Masayasu Mie<sup>†,\*</sup>

Department of Life Science and Technology, School of Life Science and Technology, Tokyo Institute of Technology, 4259 Nagatsuta-cho, Midori-ku, Yokohama, 226-8501, Japan

<sup>†</sup>Present affiliation: Department of Life Science and Technology, School of Life Science and Technology, Institute of Science Tokyo, 4259 Nagatsuta-cho, Midori-ku, Yokohama, 226-8501, Japan

E-mail: mie.m.18e2@m.isct.ac.jp, Fax: +81-45-924-5779, Phone: +81-45-924-5414

\*: corresponding author

### Table of contents

- S1. Modified Rep-ALOD4 construction
- S2. Modified Rep-ALOD4 construction
- S3. Association constant of Rep-ALOD4 with membrane cholesterol
- S4. Interaction between S-FITC-RepALOD4 and serum proteins

### **S1. Modified Rep–ALOD4 construction**

The hexapeptide sequence of ALOD4 (GTTLYP; amino acid 98–103) was substituted with AAAAAA by point mutagenesis to obtain the modified Rep–ALOD4. Briefly, the DNA sequence encoding GTTLYP in pET–Rep–(GGGS)<sub>2</sub>–Rep–ALOD4 was substituted with AAAAAA using inverse PCR-based site-directed mutagenesis. pET–Rep–(GGGS)<sub>2</sub>–Rep–ALOD4 was amplified using KOD-plus-Neo polymerase (TOYOBO, Tokyo, Japan) and mutation primers. *E. coli* KRX strain was transformed with the constructed plasmids to obtain pET–Rep–(GGGS)<sub>2</sub>–modified Rep–ALOD4, which encodes the modified Rep–ALOD4. DNA was sequenced to verify the correct sequences and corresponding amino acid sequences. The modified Rep–ALOD4 was expressed and purified using the procedure described in **2.3. Protein Expression and Purification.**

### **S2. Size exclusion chromatography (SEC) analysis**

SEC was performed using an AKTA Explorer 10S (Cytiva, MA, USA) equipped with a combination of TSKgel G3000SW<sub>XL</sub> (Tosoh). The system was eluted with 0.2 M phosphate buffer at pH 7.5 at 0.5 mL/min at 30 °C. A calibration curve for the protein molecular weight was prepared using a molecular weight marker kit (MW-GF-200; Sigma-Aldrich).

### **S3. Association constant of Rep–ALOD4 with membrane cholesterol**

From QCM analysis, the adsorption amount ( $\Delta m$ ) of Rep–ALOD4 with various concentrations to the

liposome-modified SiO<sub>2</sub> sensor chip (DOPC:cholesterol = 7:3) was calculated.  $\Delta m$  and Rep-ALOD4 concentration ( $C_0$ ) were plotted (**Figure S3b**). Then,  $C_0/\Delta m$  and  $C_0$  were plotted according to Langmuir's adsorption isotherm (**Figure S3c**):

$$\frac{C_0}{\Delta m} = \frac{1}{\Delta m_{max}}[C_0] + \frac{1}{\Delta m_{max}K_a}$$

where  $C_0$  = the concentration of protein,  $\Delta m_{max}$  = the maximum adsorption amount, and  $K_a$  = apparent association constant of protein.  $K_a$  was calculated from the slope and intercept of  $C_0/\Delta m$ - $C_0$  plot (**Fig. S3c**).

#### **S4. Interaction between S-FITC-RepALOD4 and serum proteins**

S-FITC and S-FITC-Rep-ALOD4 (10  $\mu$ M) were dissolved in DMEM medium containing 10% FBS and incubated at 37°C for 30, 60, and 90 min. For S-FITC, the solutions were measured by 3.5% agarose gel (MetaPhor Agarose, Lonza) electrophoresis. The agarose gel was irradiated with UV lamp at 365 nm. For S-FITC-Rep-ALOD4, the solutions were measured by SDS-PAGE, and the acrylamide gel was stained with CBB. Band ratio was calculated from using the ratio of the band at without to the band at each time.

(a) Rep-ALOD4

MHHHHHHAMGEFMPSKKNRSGPQPHKRWVFTLNNPSEDERKKIRDLPISLFDYFIVGEE  
GNEEGRTPHLQGFANFVKKQTFNKVKWYLGARCHIEKAKGTDQQNKEYCSKEGNLLMEC  
GAPRSQQQRGSGGGGGSGGGGSRSSAKMTLDHYGAYVAQFDVSWDEFTFDQNGKEVLT  
HKTWEGSGKDCTAHYSTVIPLPPNSKNIKIVAREATGLAWEWWRTIINEQNVPLTNEIKVSI  
G**GT**LYPTATISH

(b) Modified Rep-ALOD4

MHHHHHHAMGEFMPSKKNRSGPQPHKRWVFTLNNPSEDERKKIRDLPISLFDYFIVGEE  
GNEEGRTPHLQGFANFVKKQTFNKVKWYLGARCHIEKAKGTDQQNKEYCSKEGNLLMEC  
GAPRSQQQRGSGGGGGSGGGGSRSSAKMTLDHYGAYVAQFDVSWDEFTFDQNGKEVLT  
HKTWEGSGKDCTAHYSTVIPLPPNSKNIKIVAREATGLAWEWWRTIINEQNVPLTNEIKVSI  
G**AAAAAA**TATISH

(c) Venus-Rep

MHHHHHHAMGEFMASKGEELFTGVVPILVELDGDVNGHKFSVSGEGEGDATYGKLTCLKLIC  
TGKLPVPWPTLVTTLYGLQCFARYPDHMKQHDFFKSAMPEGYVQERTIFFKDDGNYKT  
RAEVKFEGLTLVNRIELKGIDFKEDGNILGHKLEYNYNVYITADKQKNGIKANFKIRHNI  
EDGGVQLADHYQQNTPIGDGPVLLPDNHLSYQSALS KDPNEKRDHMLLEFVTAAGGT  
EFMPSKKNRSGPQPHKRWVFTLNNPSEDERKKIRDLPISLFDYFIVGEEGNEEGRTPHL  
QGFANFVKKQTFNKVKWYLGARCHIEKAKGTDQQNKEYCSKEGNLLMECGAPRSQQQR  
VD

**Fig. S1** (a–c) The amino acid sequences of Rep-ALOD4 (a), modified Rep-ALOD4 (b), and His<sub>6</sub>-Venus-Rep (c). Highlighted sequences for Rep-ALOD4 and modified Rep-ALOD4 represent the mutated position.

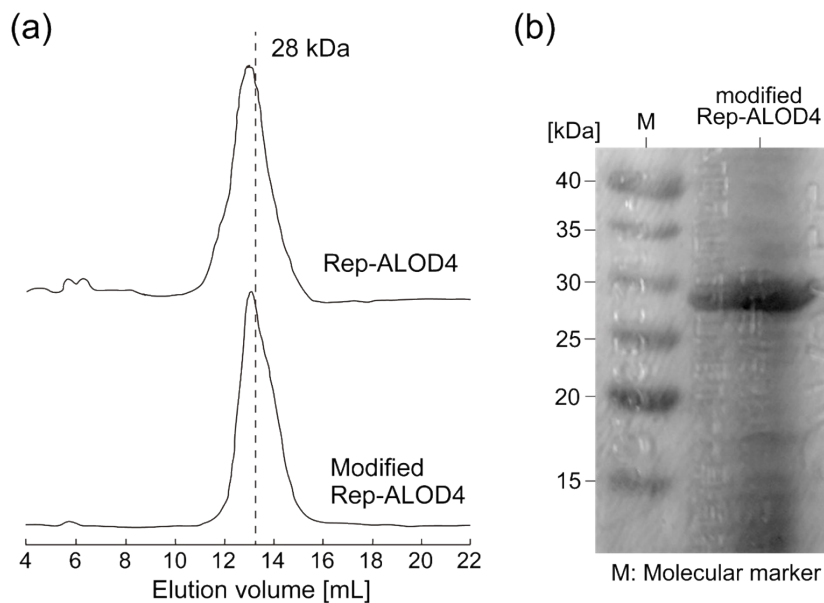

**Fig. S2** (a) SEC charts of Rep-ALOD4 and modified Rep-ALOD4. (b) SDS-PAGE patterns of modified Rep-ALOD4.

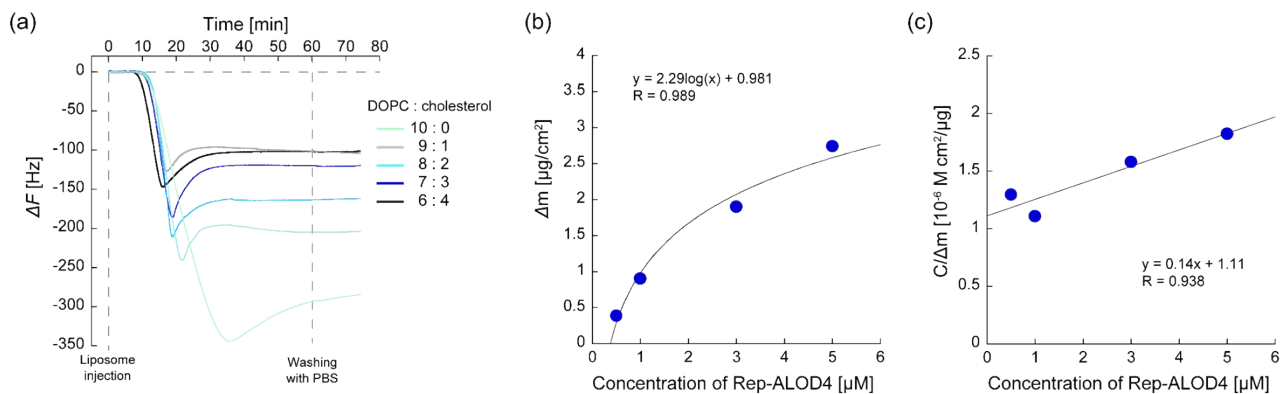

**Fig. S3** (a) Representative QCM profiles with liposomes to the sensor chip in various ratios of DOPC:cholesterol (10:1, 9:1, 8:2, 7:3, and 6:4). (b) The plot of mass change of adsorbed Rep-ALOD4 as a function of Rep-ALOD4 concentration. (c) A linear representation of the Langmuir isotherm for Rep-ALOD4 adsorption to cholesterol.

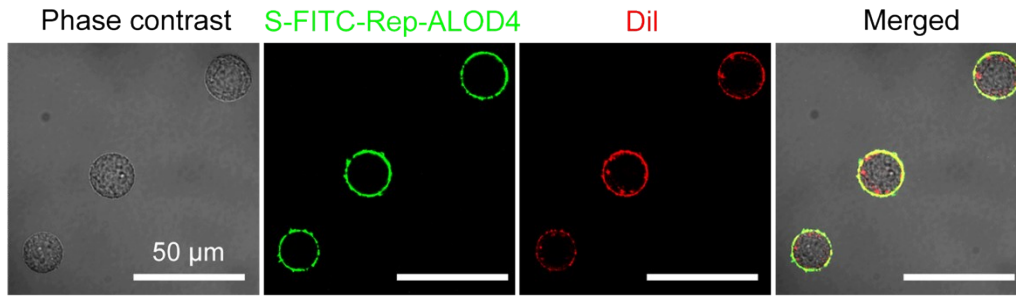

**Fig. S4** CLSM images of DiI-stained HeLa cells treated with 3  $\mu\text{M}$  S-FITC-Rep-ALOD4 after 10 min of incubation. Scale bars: 50  $\mu\text{m}$

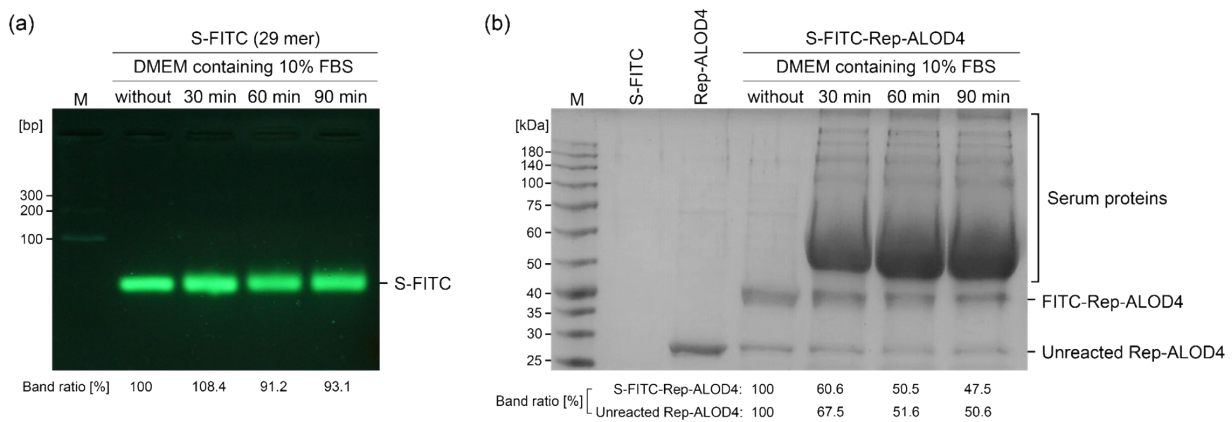

**Fig. S5 (a)** Agarose gel analysis of S-FITC (10  $\mu\text{M}$ ) incubated with 10% FBS for 30, 60, and 90 min. The band was irradiated with UV lamp at 365 nm. **(b)** SDS-PAGE analysis of S-FITC-Rep-ALOD4 (10  $\mu\text{M}$ ) incubated with 10% FBS for 30, 60, and 90 min. Band ratio was calculated from using the ratio of the band at without to the band at each time.

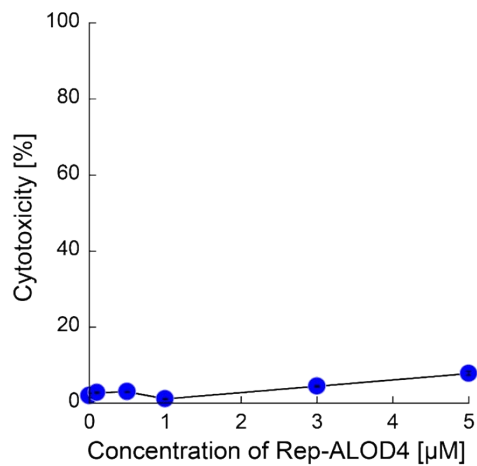

**Fig. S6** Concentration-dependent cytotoxicity of Rep-ALOD4 to HeLa cells for 24 h of incubation. Data expressed as mean  $\pm$  SD (n=3).

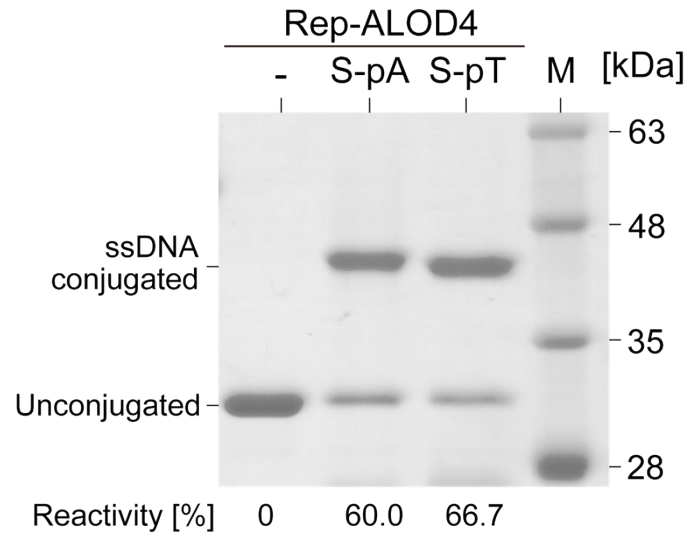

**Fig. S7** SDS-PAGE patterns of Rep-ALOD4 and S-pA- and S-pT-reacted Rep-ALOD4.
